# Supplementary material for: Target Ranges of Oxygen Saturation in Extremely Preterm Infants
Source: Atypon-hosted journal article supplement (doi:10.1056/nejmoa0911781), 2010-05-17
Supplement: nejm_support_1959sa1.pdf [file nejm_support_1959sa1.pdf]

## Supplementary Appendix

This appendix has been provided by the authors to give readers additional information about their work.

Supplement to: SUPPORT Study Group of the Eunice Kennedy Shriver NICHD Neonatal Research Network.  
Target ranges of oxygen saturation in extremely preterm infants. *N Engl J Med* 2010;362:1959-69.  
DOI: 10.1056/NEJMoa0911781.

Appendix Table 1: Cause of Death in a Randomized Trial of Lower versus Higher Oxygen Saturation Targets in Extremely Low Birth Weight Infants

| Category – no./total no. (%)   | Lower Saturation | Higher Saturation |
|--------------------------------|------------------|-------------------|
|                                | Group            | Group             |
|                                | n/N (%)          | n/N (%)           |
| Respiratory distress syndrome  | 31/130 (23.8)    | 31/107 (29.0)     |
| Infection                      | 25/130 (19.2)    | 21/107 (19.6)     |
| Necrotizing enterocolitis      | 23/130 (17.7)    | 14/107 (13.1)     |
| Bronchopulmonary dysplasia     | 14/130 (10.8)    | 10/107 (9.3)      |
| Central nervous system insult  | 12/130 (9.2)     | 9/107 (8.4)       |
| Immaturity                     | 7/130 (5.4)      | 3/107 (2.8)       |
| Other                          | 18/130 (13.8)    | 19/107 (17.8)     |
| Causes of death did not differ |                  |                   |

Appendix Table 2: Effect of Retinopathy Adjudication for Low vs. High Oxygen Saturation Target Groups

| Characteristic                                                                                                                   | Lower Saturation<br>Group (N=654)<br>n/N (%) | Higher Saturation<br>Group (N=662)<br>n/N (%) | Relative Risk for<br>Low SpO <sub>2</sub> vs. High<br>SpO <sub>2</sub> (95% CI) | Adjusted<br>P value |
|----------------------------------------------------------------------------------------------------------------------------------|----------------------------------------------|-----------------------------------------------|---------------------------------------------------------------------------------|---------------------|
| Severe retinopathy/death, All outcomes (non-adjudicated)                                                                         | 171/605 (28.3)                               | 198/616 (32.1)                                | 0.9 (0.76, 1.06)                                                                | 0.205               |
| Severe retinopathy among survivors, All outcomes (non-adjudicated)                                                               | 41/475 (8.6)                                 | 91/509 (17.9)                                 | 0.52 (0.37, 0.73)                                                               | <0.001              |
| Severe retinopathy/death, Cases considered confirmed by majority rule*                                                           | 171/642 (26.6)                               | 198/656 (30.2)                                | 0.91 (0.77, 1.07)                                                               | 0.253               |
| Severe retinopathy among survivors, Cases considered confirmed by majority rule*                                                 | 41/512 (8.0)                                 | 91/549 (16.6)                                 | 0.52 (0.37, 0.73)                                                               | <0.001              |
| Severe retinopathy/death, Cases considered confirmed majority rule* when “unknown cases” considered to have severe retinopathy†  | 183/654 (28.0)                               | 204/662 (30.8)                                | 0.93 (0.79, 1.1)                                                                | 0.412               |
| Severe retinopathy among survivors, Cases confirmed by majority rule when “unknown cases” considered to have severe retinopathy† | 53/524 (10.1)                                | 97/555 (17.5)                                 | 0.62 (0.45, 0.84)                                                               | 0.002               |

Relative risks are adjusted for gestational age stratification, center, and familial clustering;

\*Majority rule: If two reviewers determined that the infant ‘Probably never had retinopathy that met criteria for severe retinopathy intervention (laser/cryotherapy) in either eye’ then retinopathy=N; If two reviewers determined that ‘There is no way to know if severe retinopathy criteria may have been met’ then severe retinopathy=missing.

†If two reviewers determined that the infant 'Probably never had retinopathy that met criteria for severe retinopathy intervention (laser/cryotherapy) in either eye' then retinopathy=N; if two reviewers determined that 'There is no way to know if severe retinopathy criteria may have been met' then severe retinopathy=Y.

Appendix Table 3. Other Outcomes in a Randomized Trial of Lower versus Higher Oxygen Saturation Targets in Extremely Low Birth Weight Infants

| Outcome                                                                         | Lower Saturation<br>Group | Higher<br>Saturation<br>Group | Adjusted<br>P value <sup>§</sup> |
|---------------------------------------------------------------------------------|---------------------------|-------------------------------|----------------------------------|
| Length of stay any hospital, (days) m±SE*                                       | 104.5 ± 2.0               | 106.4 ± 2.0                   | 0.45                             |
| Length of stay at study hospital, (days) m±SE*                                  | 99.8 ± 2.0                | 103.0 ± 2.0                   | 0.22                             |
| Duration of mechanical ventilation, (days) m±SE <sup>†</sup>                    | 25.5 ± 1.1                | 26.9 ± 1.0                    | 0.30                             |
| Duration of oxygen supplementation, (days) m±SE <sup>†</sup>                    | 59.8 ± 1.6                | 67.4 ± 1.5                    | <0.001                           |
| Continuous positive airway pressure, (days) m±SE <sup>†</sup>                   | 17.1 ± 0.6                | 17.0 ± 0.6                    | 0.94                             |
| Nasal synchronized intermittent mandatory ventilation, (days) m±SE <sup>†</sup> | 3.3 ± 0.3                 | 3.8 ± 0.3                     | 0.14                             |
| Alive off mechanical ventilation by day 14, (days) – no. (%)                    | 332/644 (51.6)            | 326/655 (49.8)                | 0.86                             |
| Alive off mechanical ventilation by day 7, (days) – no. (%)                     | 351/648 (54.2)            | 329/659 (49.9)                | 0.27                             |
| Percent of time in actual oxygen saturation range 84-96%, (%) m±SD <sup>‡</sup> | 66.9 ± 13.9               | 68.0 ± 15.2                   | 0.16 <sup>¶</sup>                |

\*Among survivors to discharge, transfer or one year; maximum value is 366 days

<sup>†</sup>Among survivors to discharge, transfer or 120 days; maximum value is 120 days

<sup>‡</sup>Percent of time based only on total time on oxygen supplementation

§ Adjusted for stratification factors (study center, gestational age group) as well as for familial clustering

¶ Unadjusted P value
